# Supplementary material for: Posthospitalization Follow-Up of Patients With Heart Failure Using eHealth Solutions: Restricted Systematic Review
Source: PubMed Central journal article supplement (PMC8889479; doi:10.2196/32946), 2022-02-15
Supplement: jmir_v24i2e32946_app1.pdf [file jmir_v24i2e32946_app1.pdf]

# Literature Search - Documentation

| Database/source   | Embase                                                                                                                                                                                                                                                                                                                                                                                                                                                                                                                                                                                                                                                                                                                                                                                                                                                                                                                                                                                                                                                                                                                                                                                                                                                                                                                                                                                                                                                                                                                                                                                                                                                                                                                                                                                                                                  |
|-------------------|-----------------------------------------------------------------------------------------------------------------------------------------------------------------------------------------------------------------------------------------------------------------------------------------------------------------------------------------------------------------------------------------------------------------------------------------------------------------------------------------------------------------------------------------------------------------------------------------------------------------------------------------------------------------------------------------------------------------------------------------------------------------------------------------------------------------------------------------------------------------------------------------------------------------------------------------------------------------------------------------------------------------------------------------------------------------------------------------------------------------------------------------------------------------------------------------------------------------------------------------------------------------------------------------------------------------------------------------------------------------------------------------------------------------------------------------------------------------------------------------------------------------------------------------------------------------------------------------------------------------------------------------------------------------------------------------------------------------------------------------------------------------------------------------------------------------------------------------|
| Date of search    | 20.03.2020                                                                                                                                                                                                                                                                                                                                                                                                                                                                                                                                                                                                                                                                                                                                                                                                                                                                                                                                                                                                                                                                                                                                                                                                                                                                                                                                                                                                                                                                                                                                                                                                                                                                                                                                                                                                                              |
| Search History    | <p>1 exp colon tumor/ (315014)</p> <p>2 ((colorectal or colon* or rectal or sigmoid or sigmoid colon or colon sigmoid or mesocolon) adj (cancer* or carcinoma* or neoplasm* or tumor* or tumour*)).ti,ab,kw. (273006)</p> <p>3 1 or 2 (375901)</p> <p>4 exp heart failure/ (488546)</p> <p>5 (heart failure* or heart backward failure* or cardiac failure* or cardiac backward failure* or cardiac incompetence* or cardiac insufficienc* or cardiac stand still or cardial decompensation* or cardial insufficienc* or heart insufficienc* or insufficientia cardis or myocardial failure* or myocardial insufficienc*).ti,ab,kw. (298022)</p> <p>6 4 or 5 (541399)</p> <p>7 3 or 6 (914765)</p> <p>8 exp telehealth/ (42935)</p> <p>9 (telemedicine or teleconsult or telepatholog* or telerehab* or videoconsult* or skype or Mobile Health or ehealth or mhealth or digital health).ti,ab,kw. (28477)</p> <p>10 ((video* or telephone* or tele* or digital or e-mail or email or remote) adj3 (consult* or rehab* or counsel* or therap*)).ti,ab,kw. (11586)</p> <p>11 8 or 9 or 10 (61177)</p> <p>12 7 and 11 (2753)</p> <p>13 self care/ (56957)</p> <p>14 (self care or selfcare or self management or selfmanagement or self treatment or selftreatment).ti,ab,kw. (52150)</p> <p>15 "quality of life"/ (456919)</p> <p>16 ("quality of life" or life quality or HRQL or HRQOL or wellbeing or well-being or well being).ti,ab,kw. (534369)</p> <p>17 (treatment burden* or "burden of treatment*").ti,ab,kw. (3428)</p> <p>18 hospital readmission/ (61075)</p> <p>19 (readmission* or rehospitalization* or rehospitalisation*).ti,ab,kw. (56445)</p> <p>20 13 or 14 or 15 or 16 or 17 or 18 or 19 (785603)</p> <p>21 12 and 20 (1093)</p> <p>22 limit 21 to yr="2015 -Current" (576)</p> <p>23 limit 22 to embase (296)</p> |
| Number of results | 296                                                                                                                                                                                                                                                                                                                                                                                                                                                                                                                                                                                                                                                                                                                                                                                                                                                                                                                                                                                                                                                                                                                                                                                                                                                                                                                                                                                                                                                                                                                                                                                                                                                                                                                                                                                                                                     |
| Comments          |                                                                                                                                                                                                                                                                                                                                                                                                                                                                                                                                                                                                                                                                                                                                                                                                                                                                                                                                                                                                                                                                                                                                                                                                                                                                                                                                                                                                                                                                                                                                                                                                                                                                                                                                                                                                                                         |

# Literature Search - Documentation

|                          |                                                                                                                                                                                                                                                                                                                                                                                                                                                                                                                                                                                                                                                                                                                                                                                                                                                                                                                                                                                                                                                                                                                                                                                                                                                                                                                                                                                                                                                                                                                                                                                                                                                                                                                                                                                                              |
|--------------------------|--------------------------------------------------------------------------------------------------------------------------------------------------------------------------------------------------------------------------------------------------------------------------------------------------------------------------------------------------------------------------------------------------------------------------------------------------------------------------------------------------------------------------------------------------------------------------------------------------------------------------------------------------------------------------------------------------------------------------------------------------------------------------------------------------------------------------------------------------------------------------------------------------------------------------------------------------------------------------------------------------------------------------------------------------------------------------------------------------------------------------------------------------------------------------------------------------------------------------------------------------------------------------------------------------------------------------------------------------------------------------------------------------------------------------------------------------------------------------------------------------------------------------------------------------------------------------------------------------------------------------------------------------------------------------------------------------------------------------------------------------------------------------------------------------------------|
| <b>Database/source</b>   | <b>Ovid MEDLINE(R) ALL</b>                                                                                                                                                                                                                                                                                                                                                                                                                                                                                                                                                                                                                                                                                                                                                                                                                                                                                                                                                                                                                                                                                                                                                                                                                                                                                                                                                                                                                                                                                                                                                                                                                                                                                                                                                                                   |
| <b>Date of search</b>    | 20.03.2020                                                                                                                                                                                                                                                                                                                                                                                                                                                                                                                                                                                                                                                                                                                                                                                                                                                                                                                                                                                                                                                                                                                                                                                                                                                                                                                                                                                                                                                                                                                                                                                                                                                                                                                                                                                                   |
| <b>Search History</b>    | <p>1 exp Colorectal Neoplasms/ (197528)</p> <p>2 ((colorectal or colon* or rectal or sigmoid or sigmoid colon or colon sigmoid or mesocolon) adj (cancer* or carcinoma* or neoplasm* or tumor* or tumour*)).ti,ab,kf. (188857)</p> <p>3 1 or 2 (253686)</p> <p>4 exp Heart Failure/ (119088)</p> <p>5 (heart failure* or heart backward failure* or cardiac failure* or cardiac backward failure* or cardiac incompetence* or cardiac insufficienc* or cardiac stand still or cardial decompensation* or cardial insufficienc* or heart insufficienc* or insufficientia cardis or myocardial failure* or myocardial insufficienc*).ti,ab,kf. (183602)</p> <p>6 4 or 5 (212851)</p> <p>7 3 or 6 (466222)</p> <p>8 exp Telemedicine/ (27361)</p> <p>9 (telemedicine or teleconsult or telepatholog* or telerehab* or videoconsult* or skype or Mobile Health or ehealth or mhealth or digital health).ti,ab,kf. (23119)</p> <p>10 ((video* or telephone* or tele* or digital or e-mail or email or remote) adj3 (consult* or rehab* or counsel* or therap*)).ti,ab,kf. (8308)</p> <p>11 8 or 9 or 10 (44301)</p> <p>12 7 and 11 (1239)</p> <p>13 Self Care/ (32616)</p> <p>14 (self care or selfcare or self management or selfmanagement or self treatment or selftreatment).ti,ab,kf. (35892)</p> <p>15 "Quality of Life"/ (189590)</p> <p>16 ("quality of life" or life quality or HRQL or HRQOL or wellbeing or well-being or well being).ti,ab,kf. (349469)</p> <p>17 (treatment burden* or "burden of treatment*").ti,ab,kf. (1852)</p> <p>18 Patient Readmission/ (16631)</p> <p>19 (readmission* or rehospitalization* or rehospitalisation*).ti,ab,kf. (31107)</p> <p>20 13 or 14 or 15 or 16 or 17 or 18 or 19 (481117)</p> <p>21 12 and 20 (512)</p> <p>22 limit 21 to yr="2015 -Current" (291)</p> |
| <b>Number of results</b> | 291                                                                                                                                                                                                                                                                                                                                                                                                                                                                                                                                                                                                                                                                                                                                                                                                                                                                                                                                                                                                                                                                                                                                                                                                                                                                                                                                                                                                                                                                                                                                                                                                                                                                                                                                                                                                          |
| <b>Comments</b>          |                                                                                                                                                                                                                                                                                                                                                                                                                                                                                                                                                                                                                                                                                                                                                                                                                                                                                                                                                                                                                                                                                                                                                                                                                                                                                                                                                                                                                                                                                                                                                                                                                                                                                                                                                                                                              |

# Literature Search - Documentation

|                          |                                                                                                                                                                                                                                                                                                                                                                                                                                                                                                                                                                                                                                                                                                                                                                                                                                                                                                                                                                                                                                                                                                                                                                                                                                                                                                                                                                                                                                                                                                                                                                                                                                                                                                                                                                                                                                                                                                                                                                                                                                                                                                      |
|--------------------------|------------------------------------------------------------------------------------------------------------------------------------------------------------------------------------------------------------------------------------------------------------------------------------------------------------------------------------------------------------------------------------------------------------------------------------------------------------------------------------------------------------------------------------------------------------------------------------------------------------------------------------------------------------------------------------------------------------------------------------------------------------------------------------------------------------------------------------------------------------------------------------------------------------------------------------------------------------------------------------------------------------------------------------------------------------------------------------------------------------------------------------------------------------------------------------------------------------------------------------------------------------------------------------------------------------------------------------------------------------------------------------------------------------------------------------------------------------------------------------------------------------------------------------------------------------------------------------------------------------------------------------------------------------------------------------------------------------------------------------------------------------------------------------------------------------------------------------------------------------------------------------------------------------------------------------------------------------------------------------------------------------------------------------------------------------------------------------------------------|
| <b>Database/source</b>   | <b>Cochrane Library</b>                                                                                                                                                                                                                                                                                                                                                                                                                                                                                                                                                                                                                                                                                                                                                                                                                                                                                                                                                                                                                                                                                                                                                                                                                                                                                                                                                                                                                                                                                                                                                                                                                                                                                                                                                                                                                                                                                                                                                                                                                                                                              |
| <b>Date of search</b>    | 20.03.2020                                                                                                                                                                                                                                                                                                                                                                                                                                                                                                                                                                                                                                                                                                                                                                                                                                                                                                                                                                                                                                                                                                                                                                                                                                                                                                                                                                                                                                                                                                                                                                                                                                                                                                                                                                                                                                                                                                                                                                                                                                                                                           |
| <b>Search History</b>    | <p>#1 MeSH descriptor: [Colorectal Neoplasms] explode all trees 7862</p> <p>#2 ((colorectal or colon* or rectal or sigmoid or "sigmoid colon" or "colon sigmoid" or mesocolon) NEXT (cancer* or carcinoma* or neoplasm* or tumor* or tumour*)) 19754</p> <p>#3 #1 or #2 19895</p> <p>#4 MeSH descriptor: [Heart Failure] explode all trees 9088</p> <p>#5 heart NEXT failure* or heart NEXT backward NEXT failure* or cardiac NEXT failure* or cardiac NEXT backward NEXT failure* or cardiac NEXT incompetence* or cardiac NEXT insufficienc* or "cardiac stand still" or cardial NEXT decompensation* or cardial NEXT insufficienc* or heart NEXT insufficienc* or "insufficiencia cardis" or myocardial NEXT failure* or myocardial NEXT insufficienc* 29721</p> <p>#6 #4 or #5 29737</p> <p>#7 #3 or #6 49487</p> <p>#8 MeSH descriptor: [Telemedicine] explode all trees 2314</p> <p>#9 (telemedicine or teleconsult or telepatholog* or telerehab* or videoconsult* or skype or "Mobile Health" or ehealth or mhealth or "digital health"):ti,ab,kw 6000</p> <p>#10 ((video* or telephone* or tele* or digital or "e-mail" or email or remote) NEAR/2 (consult* or rehab* or counsel* or therap*)) 4815</p> <p>#11 #8 or #9 or #10 9771</p> <p>#12 #7 and #11 541</p> <p>#13 MeSH descriptor: [Self Care] this term only 4019</p> <p>#14 ("self care" or selfcare or "self management" or selfmanagement or "self treatment" or selftreatment):ti,ab,kw 13545</p> <p>#15 MeSH descriptor: [Quality of Life] this term only 22749</p> <p>#16 ("quality of life" or "life quality" or HRQL or HRQOL or wellbeing or "well-being" or "well being"):ti,ab,kw 113086</p> <p>#17 (treatment NEXT burden* or burden NEXT of NEXT treatment*):ti,ab,kw 365</p> <p>#18 MeSH descriptor: [Patient Readmission] this term only 1005</p> <p>#19 (readmission* or rehospitalization* or rehospitalisation*):ti,ab,kw 7769</p> <p>#20 #13 or #14 or #15 or #16 or #17 or #18 or #19 128019</p> <p>#21 #12 and #20 321</p> <p>#22 #21 with Cochrane Library publication date from Jan 2015 to present 227</p> |
| <b>Number of results</b> | 227                                                                                                                                                                                                                                                                                                                                                                                                                                                                                                                                                                                                                                                                                                                                                                                                                                                                                                                                                                                                                                                                                                                                                                                                                                                                                                                                                                                                                                                                                                                                                                                                                                                                                                                                                                                                                                                                                                                                                                                                                                                                                                  |
| <b>Comments</b>          |                                                                                                                                                                                                                                                                                                                                                                                                                                                                                                                                                                                                                                                                                                                                                                                                                                                                                                                                                                                                                                                                                                                                                                                                                                                                                                                                                                                                                                                                                                                                                                                                                                                                                                                                                                                                                                                                                                                                                                                                                                                                                                      |

# Literature Search - Documentation

|                 |                                                                                                                                                                                                                                                                                                                                                                                                                                                                                                                                                                                                                                                                                                                                                                                                                                                                                                                                                                                                                                                                                                                                                                                                                                                                                                                                                                                                                                                                                                                                                                                                                                                                                                                                                                                                                                                                                                                                                                                             |
|-----------------|---------------------------------------------------------------------------------------------------------------------------------------------------------------------------------------------------------------------------------------------------------------------------------------------------------------------------------------------------------------------------------------------------------------------------------------------------------------------------------------------------------------------------------------------------------------------------------------------------------------------------------------------------------------------------------------------------------------------------------------------------------------------------------------------------------------------------------------------------------------------------------------------------------------------------------------------------------------------------------------------------------------------------------------------------------------------------------------------------------------------------------------------------------------------------------------------------------------------------------------------------------------------------------------------------------------------------------------------------------------------------------------------------------------------------------------------------------------------------------------------------------------------------------------------------------------------------------------------------------------------------------------------------------------------------------------------------------------------------------------------------------------------------------------------------------------------------------------------------------------------------------------------------------------------------------------------------------------------------------------------|
| Database/source | CINAHL                                                                                                                                                                                                                                                                                                                                                                                                                                                                                                                                                                                                                                                                                                                                                                                                                                                                                                                                                                                                                                                                                                                                                                                                                                                                                                                                                                                                                                                                                                                                                                                                                                                                                                                                                                                                                                                                                                                                                                                      |
| Date of search  | 20.03.2020                                                                                                                                                                                                                                                                                                                                                                                                                                                                                                                                                                                                                                                                                                                                                                                                                                                                                                                                                                                                                                                                                                                                                                                                                                                                                                                                                                                                                                                                                                                                                                                                                                                                                                                                                                                                                                                                                                                                                                                  |
| Search History  | <p>S22 S12 AND S20 Limiters - Published Date: 20150101-20201231 135</p> <p style="text-align: center;">Search modes - Boolean/Phrase</p> <p>S21 S12 AND S20 Search modes - Boolean/Phrase 274</p> <p>S20 S13 OR S14 OR S15 OR S16 OR S17 OR S18 OR S19 Search modes - Boolean/Phrase 319,52</p> <p>S19 readmission* or rehospitalization* or rehospitalisation* Search modes - Boolean/Phrase 21,962</p> <p>S18 (MH "Readmission") Search modes - Boolean/Phrase 13,944</p> <p>S17 "treatment burden*" or "burden of treatment*" Search modes - Boolean/Phrase 696</p> <p>S16 "quality of life" or "life quality" or HRQL or HRQOL or wellbeing or "well-being" or "well being" Search modes - Boolean/Phrase 246,342</p> <p>S15 (MH "Quality of Life") Search modes - Boolean/Phrase 115,867</p> <p>S14 "self care" or selfcare or "self management" or selfmanagement or "self treatment" or selftreatment Search modes - Boolean/Phrase 62,401</p> <p>S13 (MH "Self Care") Search modes - Boolean/Phrase 42,229</p> <p>S12 S7 AND S11 Search modes - Boolean/Phrase 636</p> <p>S11 S8 OR S9 OR S10 Search modes - Boolean/Phrase 24,57</p> <p>S10 ((video* or telephone* or tele* or digital or "e-mail" or email or remote) N2 (consult* or rehab* or counsel* or therap*)) Search modes - Boolean/Phrase 6,154</p> <p>S9 telemedicine or teleconsult or telepatholog* or telerehab* or videoconsult* or skype or "Mobile Health" or ehealth or mhealth or "digital health" Search modes - Boolean/Phrase 19,5</p> <p>S8 (MH "Telemedicine+") Search modes - Boolean/Phrase 13,227</p> <p>S7 S3 OR S6 Search modes - Boolean/Phrase 115,206</p> <p>S6 S4 OR S5 Search modes - Boolean/Phrase 65,638</p> <p>S5 "heart failure*" or "heart backward failure*" or "cardiac failure*" or "cardiac backward failure*" or "cardiac incompetence*" or "cardiac insufficienc*" or "cardiac stand still" or "cardial decompensation*" or "cardial insufficienc*" or "heart insufficienc*" or</p> |

## Literature Search - Documentation

|                          |                                                                                                                                                                                                       |
|--------------------------|-------------------------------------------------------------------------------------------------------------------------------------------------------------------------------------------------------|
|                          | "insufficiencia cardis" or "myocardial failure*" or "myocardial insufficienc*" Search modes - Boolean/Phrase 65,594                                                                                   |
|                          | S4 (MH "Heart Failure+") Search modes - Boolean/Phrase 42,634                                                                                                                                         |
|                          | S3 S1 OR S2 Search modes - Boolean/Phrase 49,692                                                                                                                                                      |
|                          | S2 ((colorectal or colon* or rectal or sigmoid or "sigmoid colon" or "colon sigmoid" or mesocolon) W0 (cancer* or carcinoma* or neoplasm* or tumor* or tumour*)) Search modes - Boolean/Phrase 48,046 |
|                          | S1 (MH "Colorectal Neoplasms+") Search modes - Boolean/Phrase 40,837                                                                                                                                  |
| <b>Number of results</b> | 135                                                                                                                                                                                                   |
| <b>Comments</b>          |                                                                                                                                                                                                       |

|                          |                                                                                                                                                                                                                                                                                                                                                                                                                                    |
|--------------------------|------------------------------------------------------------------------------------------------------------------------------------------------------------------------------------------------------------------------------------------------------------------------------------------------------------------------------------------------------------------------------------------------------------------------------------|
| <b>Database/source</b>   | Google Scholar                                                                                                                                                                                                                                                                                                                                                                                                                     |
| <b>Date of search</b>    | 23.03.2020                                                                                                                                                                                                                                                                                                                                                                                                                         |
| <b>Search History</b>    | <p>4 individual smaller searches carried out in order to get the articles with highest Google Page Rank:</p> <p>Search 1:<br/>"Heart failure" telehealth telemedicine mhealth ehealth</p> <p>Search 2:<br/>"Colon cancer" telehealth telemedicine mhealth ehealth</p> <p>Search 3:<br/>"Colorectal cancer" telehealth telemedicine mhealth ehealth</p> <p>Search 4<br/>"Rectal cancer" telehealth telemedicine mhealth ehealth</p> |
| <b>Number of results</b> | 200 (the first 50 articles (highest Page Rank) were selected for each search, totalling 200 articles. This was carried out using Harzing.com's Publish or Perish software.)                                                                                                                                                                                                                                                        |
| <b>Comments</b>          |                                                                                                                                                                                                                                                                                                                                                                                                                                    |
